# Supplementary material for: EP3/FP dual receptor agonist ONO-9054 administered morning or evening to patients with open-angle glaucoma or ocular hypertension: results of a randomised crossover study
Source: PubMed Central journal article supplement — Br J Ophthalmol. 2015 Oct 9;100(6):843–7. doi: 10.1136/bjophthalmol-2015-307000 (PMC4893083; doi:10.1136/bjophthalmol-2015-307000), 2015-10-09

## **SUPPLEMENTARY FIGURES**

**Supplementary Figure 1:** Summary of study design

**Supplementary Figure 2:** Mean ONO-AG-367 Plasma Concentrations v. Time for AM dosing (open circle) and PM dosing (closed circle) on Day 1

**Supplementary Figure 3:** Mean ONO-AG-367 Plasma Concentrations v. Time for AM dosing (open circle) and PM dosing (closed circle) on Day 1

Supplementary Figure 1

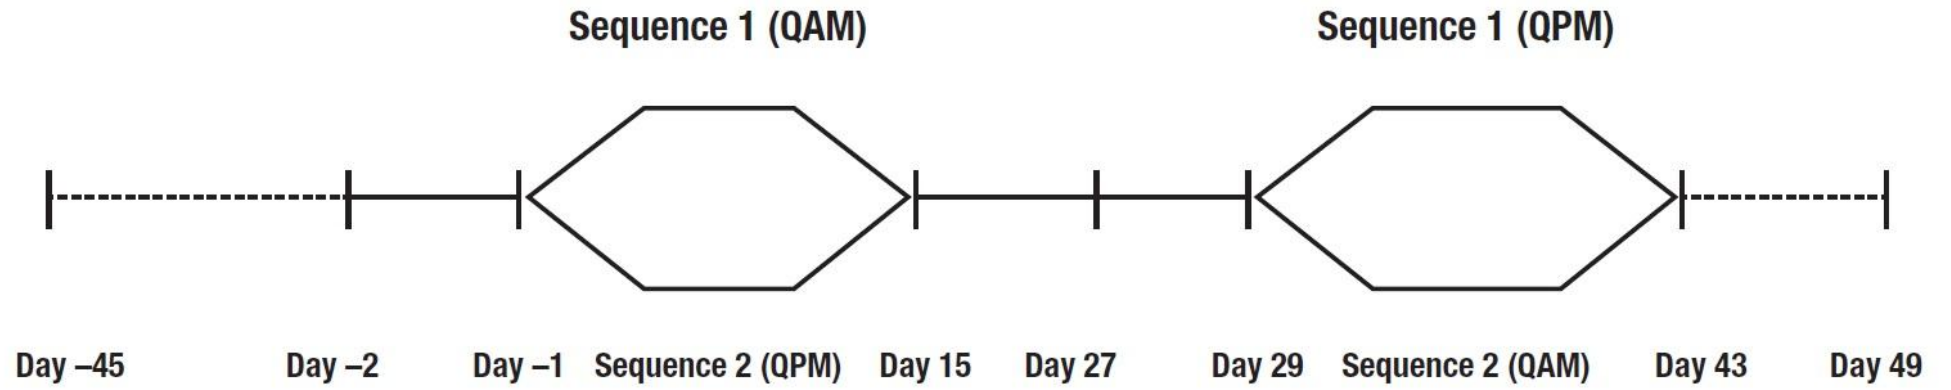

|                            |                         |                                               |                     |                                               |           |
|----------------------------|-------------------------|-----------------------------------------------|---------------------|-----------------------------------------------|-----------|
| Screening<br><br>(43 days) | Predose<br><br>(2 days) | Dosing and Evaluation<br><br>(14 days dosing) | Washout (14 days)   | Dosing and Evaluation<br><br>(14 days dosing) | Follow-Up |
|                            |                         |                                               | Predose<br>(2 days) |                                               |           |

## Supplementary Figure 2

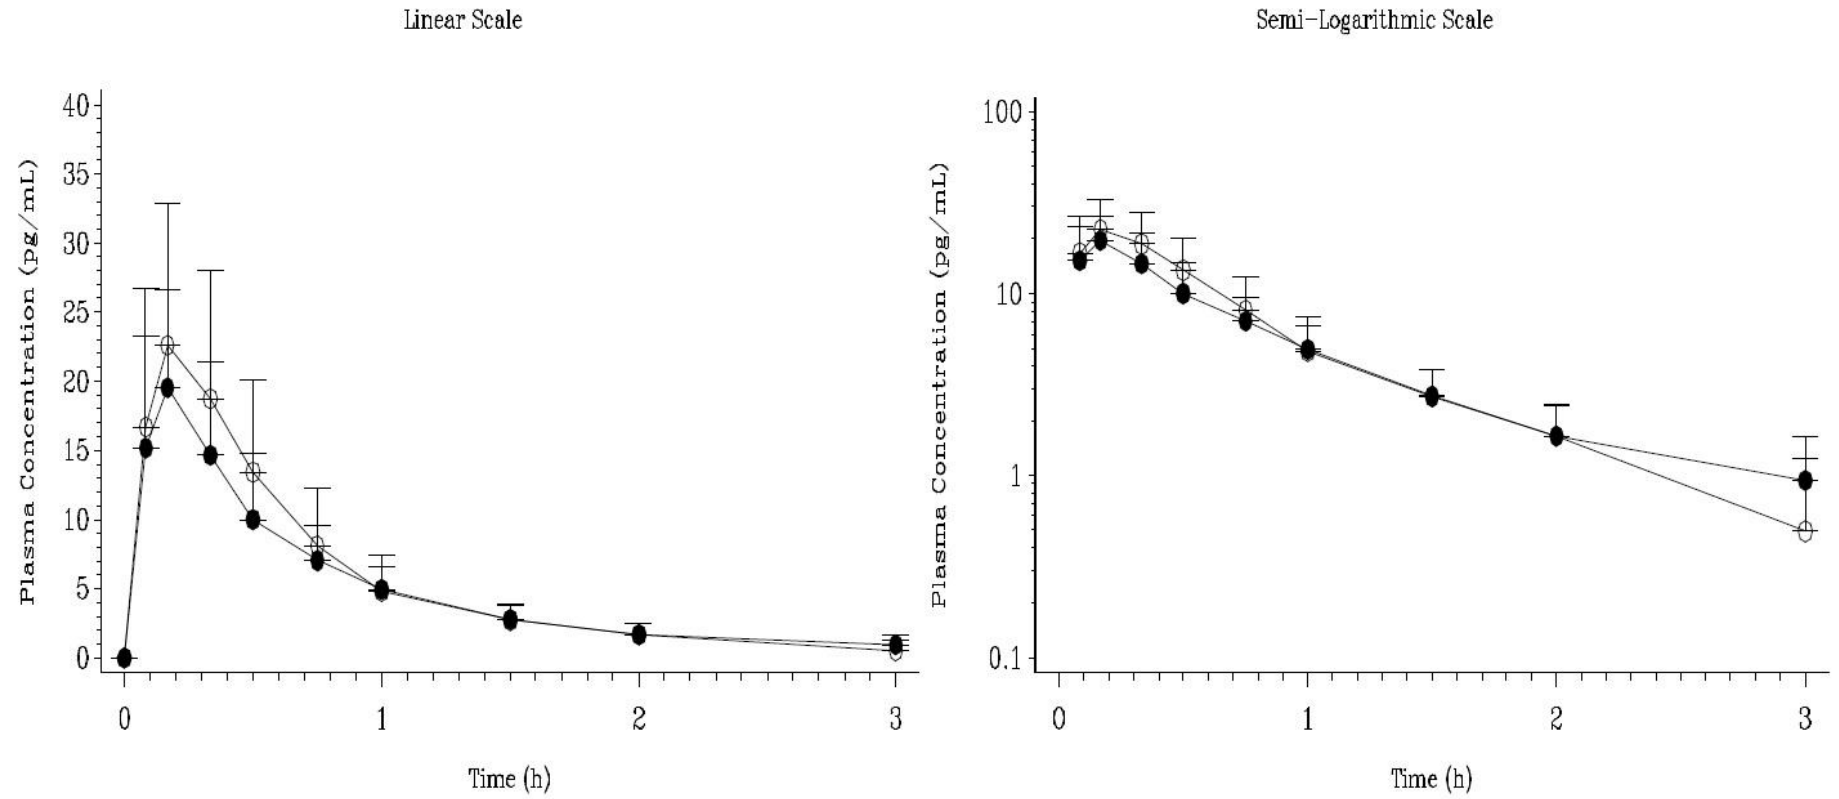

Supplementary Figure 3

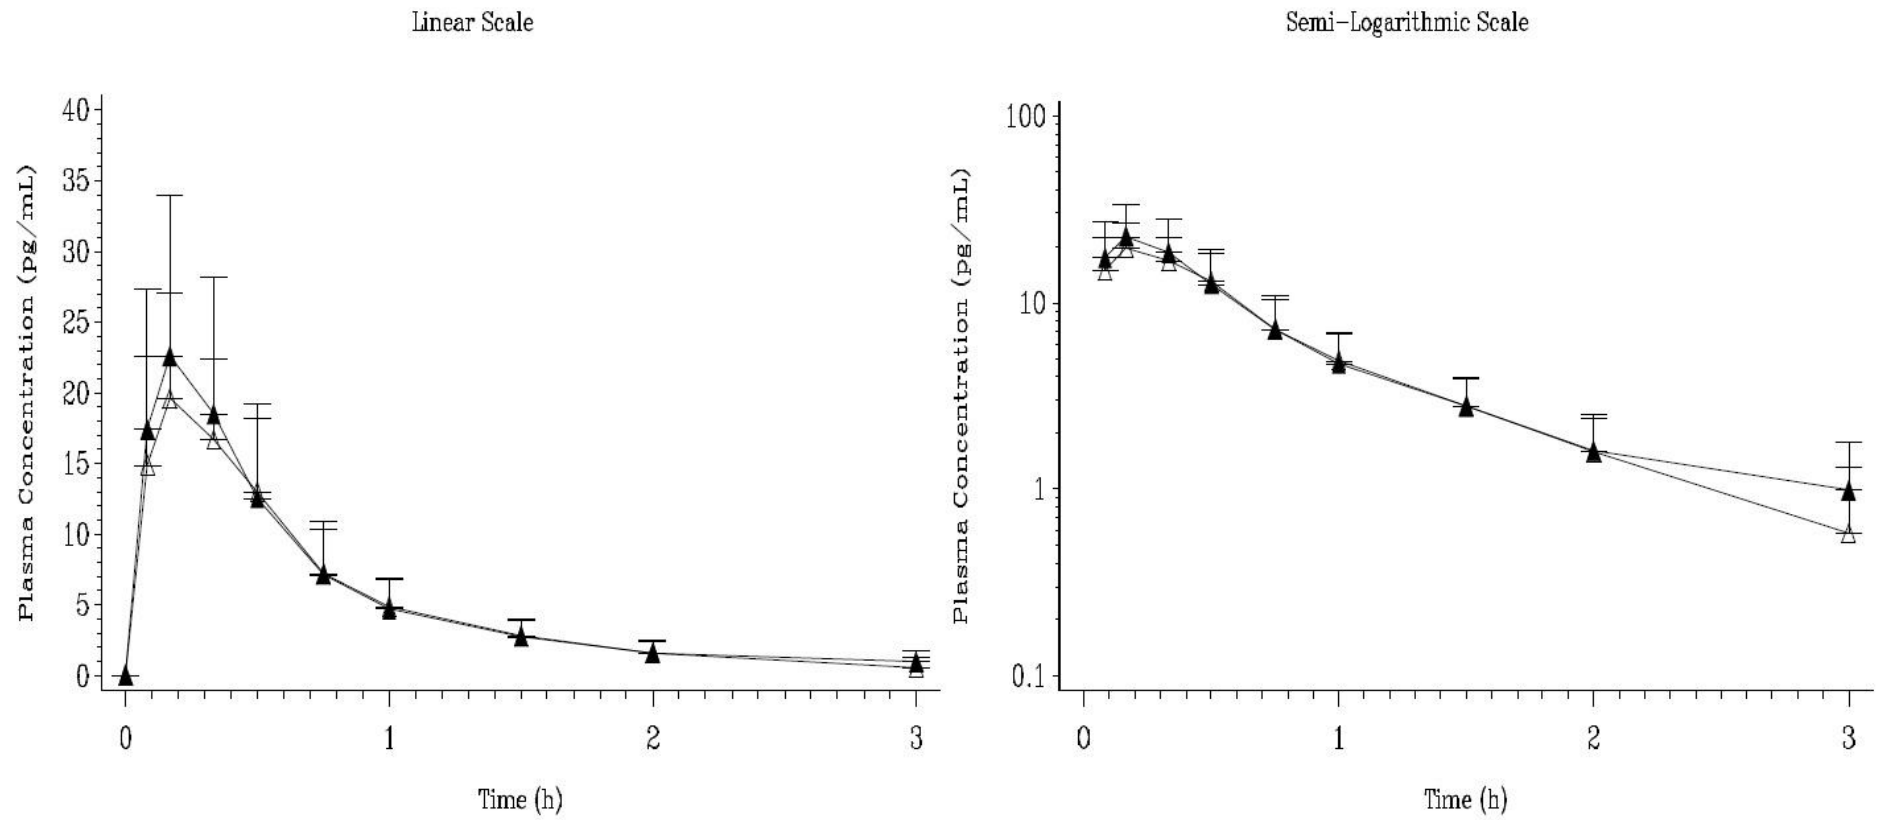

Supplement: bjophthalmol-2015-307000-s1.pdf [file bjophthalmol-2015-307000-s1.pdf]
